# Supplementary material for: Proteomic responses to hypoxia at different temperatures in the great scallop (Pecten maximus)
Source: PeerJ. 2015 Mar 31;3:e871. doi: 10.7717/peerj.871 (PMC4389274; doi:10.7717/peerj.871)
Supplement: File S1 [file peerj-03-871-s001.xlsx]

## Sheet: Sheet1
	Date	Temperature (°C)	O2 (% Sat.)	O2 (mg/L)	Salinity	pH
Bac 1	2013-04-05	9	100.6	9.36	35.3	8.135
Bac 2	2013-04-05	8.8	99.8	9.24	35.5	8.126
Bac 3	2013-04-05	8.9	99.2	9.17	35.2	8.123
Bac 1	2013-04-06	9.7	101.8	9.22	33.7	8.151
Bac 2	2013-04-06	9.4	102.2	9.42	33.8	8.165
Bac 3	2013-04-06	9.4	101.8	9.4	33.8	8.169
Bac 1	2013-04-07	9.2	101.8	9.37	33.6	8.11
Bac 2	2013-04-07	9.1	101.9	9.34	33.7	8.157
Bac 3	2013-04-07	9.2	101.8	9.3	33.8	8.16
Bac 1	2013-04-08	9	101	9.11	33.6	8.16
Bac 2	2013-04-08	9	101.6	9.27	33.7	8.169
Bac 3	2013-04-08	9.1	101.2	9.21	33.8	8.164
Bac 1	2013-04-09	9.6	102.7	9.21	36.2	8.182
Bac 2	2013-04-09	10.8	102.7	8.98	36.4	8.17
Bac 3	2013-04-09	11.1	102.5	8.87	36.1	8.157
Bac 1	2013-04-10	10	101.3		35.8	8.17
Bac 2	2013-04-10	11.8	101.9		36.8	8.151
Bac 3	2013-04-10	11.9	100.1		37	8.115
Bac 1	2013-04-11	11.1	101	8.64	33.5	8.179
Bac 2	2013-04-11	12.9	101.1	8.35	34	8.146
Bac 3	2013-04-11	12.8	100.6	8.35	33.9	8.065
Bac 1	2013-04-12	11	99	8.54	33.7	8.131
Bac 2	2013-04-12	14.7	101	8.06	34	8.122
Bac 3	2013-04-12	15.2	100	7.93	33.8	8.121
Bac 1	2013-04-13	10.7	100.2	8.74	33.5	8.127
Bac 2	2013-04-13	14.2	100.9	8.15	33.8	8.105
Bac 3	2013-04-13	12.8	99.9	8.34	33.7	8.124
Bac 1	2013-04-14	11.2	100.2	8.69	8.141	33.7
Bac 2	2013-04-14	15.9	100.8	7.87	8.096	33.7
Bac 3	2013-04-14	15.8	99	7.83	8.096	33.8
Bac 1	2013-04-15	11.1	99.5	8.7	34.6	8.167
Bac 2	2013-04-15	16.8	100.2	7.86	33.6	8.095
Bac 3	2013-04-15	16.6	99.5	7.77	33.9	8.106
Bac 1	2013-04-16	11.5	98.9	8.58	33.3	8.118
Bac 2	2013-04-16	18.1	100.8	7.54	33.9	8.089
Bac 3	2013-04-16	18.2	98.3	7.49	33.5	8.092
Bac 1	2013-04-17	12	100.1	8.55	33.2	8.176
Bac 2	2013-04-17	18	100.1	7.53	33.7	8.108
Bac 3	2013-04-17	19	99.3	7.38	33.6	8.09
Bac 1	2013-04-18	11	100.3	8.181	33.6	8.85
Bac 2	2013-04-18	18	101.1	7.67	33.7	8.127
Bac 3	2013-04-18	21	97.5	7.24	33.6	8.049
Bac 1	2013-04-19	11	100.3	8.85	33.6	8.181
Bac 2	2013-04-19	18	101.1	7.67	33.7	8.127
Bac 3	2013-04-19	21	97.5	7.24	33.6	8.049
Bac 1	2013-04-20	11.2	99.7	8.62	32.9	8.198
Bac 2	2013-04-20	18.1	98	7.49	33.3	8.118
Bac 3	2013-04-20	21	97.5	7.26	33.6	8.015
Bac 1	2013-04-21	11.7	100.5	8.33	32.6	8.215
Bac 2	2013-04-21	18	101.7	7.58	32.9	8.109
Bac 3	2013-04-21	22.1	97.1	6.92	33.4	7.998
Bac 1	2013-04-22	11.4	100.7	8.71	32.9	8.172
Bac 2	2013-04-22	17.6	100.4	7.59	33.1	8.101
Bac 3	2013-04-22	23.1	98.1	6.91	33.2	8.03
Bac 1	2013-04-23	12.1	96.1	8.26	33.3	8.143
Bac 2	2013-04-23	18.5	95.5	7.25	33.5	8.09
Bac 3	2013-04-23	23.9	94.7	6.49	33.4	8.002
Bac 1	2013-04-24	11.9	100.4	8.26	35.5	8.213
Bac 2	2013-04-24	18.1	100.7	7.69	33.2	8.225
Bac 3	2013-04-24	25.1	99.4	6.73	33.4	8.134
Bac 1	2013-04-25	12.4	98.4	8.31	33	8.231
Bac 2	2013-04-25	18.4	97.2	7.42	33.4	8.177
Bac 3	2013-04-25	24.9	96.5	6.52	33.5	8.039
Bac 1	2013-04-26	11.8	101.5	8.76	35.8	8.205
Bac 2	2013-04-26	18	101.7	7.81	33.3	8.215
Bac 3	2013-04-26	24.9	99.9	6.73	33.4	8.096
Bac 1	2013-04-27	11.4	102.3	8.86	33.3	8.251
Bac 2	2013-04-27	18.3	99.4	7.54	33.3	8.238
Bac 3	2013-04-27	25	99.4	6.64	33.6	8.129
Bac 1	2013-04-28	11.9	99	8.51	33.4	8.206
Bac 2	2013-04-28	18.4	99.3	7.56	33.7	8.241
Bac 3	2013-04-28	24.7	98.4	6.68	33.9	8.079
Bac 1	2013-04-29	12	100.6	8.66	35	8.255
Bac 2	2013-04-29	17.9	101.1	7.75	33.7	8.254
Bac 3	2013-04-29	24.8	99.8	6.74	33.9	8.12
Bac 1	2013-05-01	11.6	99.3	10.76	33.2	8.076
Bac 2	2013-05-01	18.3	97.6	9.36	33.9	8.168
Bac 3	2013-05-01	25	98.3	8.15	34	8.094
Bac 1	2013-05-02	11.9	97.3	8.42	33.7	8.208
Bac 2	2013-05-02	16.6	95.4	7.7	33.9	8.212
Bac 3	2013-05-02	25.1	96.5	6.55	34	8.137
Bac 1	2013-05-03	11.9	99.6	8.52	33.8	8.233
Bac 2	2013-05-03	18.1	100.9	7.67	33.7	8.312
Bac 3	2013-05-03	25.1	98.2	6.64	34.1	8.188
Bac 1	2013-05-04	12.1	100.8	8.63	33.9	8.259
Bac 2	2013-05-04	18.1	101.3	7.69	33.9	8.323
Bac 3	2013-05-04	25	98.4	6.75	34.1	8.195
Bac 1	2013-05-05	12.4	100.9	8.61	36.7	8.302
Bac 2	2013-05-05	18.2	98.9	7.59	34	8.322
Bac 3	2013-05-05	24.8	98.3	6.76	34.2	8.182
Bac 1	2013-05-06	13	100.1	8.36	35.3	8.24
Bac 2	2013-05-06	18	101.8	7.69	34.4	8.313
Bac 3	2013-05-06	24.4	100.3	6.97	34.1	8.217
Bac 1	2013-05-07	13.1	100.2	8.35	36.2	8.304
Bac 2	2013-05-07	18.1	101.2	7.66	33.6	8.307
Bac 3	2013-05-07	25	100.9	6.7	33.9	8.23
Bac 1	2013-05-08	NA	NA	NA	NA	NA
Bac 2	2013-05-08	NA	NA	NA	NA	NA
Bac 3	2013-05-08	25	100.2	6.67	33.8	8.167
Bac 1	2013-05-09	NA	NA	NA	NA	NA
Bac 2	2013-05-09	NA	NA	NA	NA	NA
Bac 3	2013-05-09	25.1	99.4	8.15	34	8.255
Bac 1	2013-05-10	NA	NA	NA	NA	NA
Bac 2	2013-05-10	NA	NA	NA	NA	NA
Bac 3	2013-05-10	25.3	97.5	6.33	34.2	8.225
Bac 1	2013-05-11	NA	NA	NA	NA	NA
Bac 2	2013-05-11	NA	NA	NA	NA	NA
Bac 3	2013-05-11	25.1	99.4	6.68	34.5	8.208
Bac 1	2013-05-12	NA	NA	NA	NA	NA
Bac 2	2013-05-12	NA	NA	NA	NA	NA
Bac 3	2013-05-12	24.8	102.5	6.94	34.2	8.195
Bac 1	2013-05-13	NA	NA	NA	NA	NA
Bac 2	2013-05-13	NA	NA	NA	NA	NA
Bac 3	2013-05-13	25.1	101.1	6.82	34.3	8.265
Bac 1	2013-05-14	NA	NA	NA	NA	NA
Bac 2	2013-05-14	NA	NA	NA	NA	NA
Bac 3	2013-05-14	25.2	101	6.59	34.3	8.268
